# Supplementary material
Source: HighWire-hosted journal article supplement (https://gut.bmj.com/content/67/1/36)
Supplement: inline-supplementary-material-1 [file inline-supplementary-material-1.pdf]

## Supplementary Material

### *Patient Population and Clinical Phenotyping*

Well-characterized CD patients from the adult IBD Center at University of North Carolina were included in this study (IRB Approval # 10-0355, 14-2445 and 11-0359). A total of 32 and 21 samples were submitted for RNA-seq and FAIRE-seq analyses, respectively. All non-genetic clinical phenotype data were collected by chart review and stored in a secured database. Clinical phenotypes included demographic and clinical variables: age, gender, disease duration, age at diagnosis, disease location, and type of disease behavior (Table 1; Supplementary Table 2). Mucosal biopsies were obtained from macroscopically unaffected sections of the ascending colon at time of surgery. These were also confirmed by an independent pathologist to have no active inflammation, only quiescent colitis. Tissue from non-IBD control patients was obtained at time for surgical resection for non-IBD related illness (Supplementary Table 3) and from a site distant from any pathology. The normal status of the area was confirmed by histology.

### *Tissue Isolation and Processing for RNA and DNA*

Total RNA was isolated from flash-frozen tissue samples (mucosal not whole tissue) from surgical resections using the Qiagen RNeasy kit following the manufacturer's protocol. DNA for FAIRE was isolated from the same samples as previously described[1].

### *Cell Culture and transcriptional reporter assay*

Human THP-1 acute monocytic leukemia cells were grown in RPMI-1640 supplemented with 10% fetal bovine serum and 1% penicillin/streptomycin at 37°C and 5% CO<sub>2</sub>. THP-1 cells were seeded into 24-well plates (300,000 cells/well) 3 hours prior to transfection.

Regulatory elements were PCR-amplified from THP-1 genomic DNA using the primers below. Amplicons were cloned into the KpnI and XhoI restriction sites of the firefly luciferase reporter vector pGL4.23 in both the forward and reverse directions with respect to the minimal promoter. Individual clones were isolated and validated by Sanger sequencing. Each clone was transfected into THP-1 cells in duplicate (500 ng per well) using Lipofectamine 3000 and Opti-MEM. Additionally, pHRL-TK *Renilla* luciferase reporter vector (40 ng) was transfected as an internal transfection efficiency control. After 48 hours, cell lysates were seeded into a 96-well plate in triplicate and luciferase activity was measured using the Dual Luciferase Reporter Assay System. Activity was normalized to the empty vector control. Two-tailed t-tests were performed on the raw firefly luciferase/*renilla* luciferase activity ratio.

|                        |                         |
|------------------------|-------------------------|
| <i>SLC16A9</i>         |                         |
| Forward                | TGATTAGTAGGCCTCTCTCTGT  |
| Reverse                | GCTCCTCTAGACTAGACTGATTG |
| <i>SLC16A9</i> inverse |                         |
| Forward                | GCTCCTCTAGACTAGACTGATTG |
| Reverse                | TGATTAGTAGGCCTCTCTCTGT  |
| <i>DEPDC7</i>          |                         |
| Forward                | AAGAGGTTAAATGATTTGCCCTG |
| Reverse                | CCCATGCAATTGAAAATCCACA  |
| <i>DEPDC7</i> inverse  |                         |
| Forward                | CCCATGCAATTGAAAATCCACA  |
| Reverse                | AAGAGGTTAAATGATTTGCCCTG |

### *RT-qPCR*

Total RNA was isolated from flash-frozen tissue samples (mucosal not whole tissue) from surgical resections using the Qiagen RNeasy kit following the manufacturer's protocol. cDNA was derived from 1µg RNA by reverse transcriptase using the BioRad iScript cDNA Synthesis kit. RT-qPCR was then performed on these cDNA samples using the BioLine Hi-ROX SYBR kit with specific primers.

| Gene    | Forward (5'-3')            | Reverse (5'-3')           |
|---------|----------------------------|---------------------------|
| PYGL    | CACTCAAGTGGTCCTGGCTC       | CGCATGGTGTTGACAGTGTT      |
| PDK1    | GGACTTCTACGCGCGCTTCT       | AGCATTCACTGATCCGAAGTCC    |
| CEACAM7 | CACCCTGAATGTCCGCTATGA      | CAGTCACTCTTCCCGAAATGC     |
| APOA1   | GCCTTGGGAAAACAGCTAAACC     | CCAGAACTCCTGGGTCACA       |
| SUSD2   | CTCGGGACACTCAACAACGA       | CATTGTGCACGGTCCAGTTG      |
| XPNPEP  | CACCCGTGTGCTGATAGGAA       | CCACCATTGCGCCCTGATGTA     |
| GOLGA1  | GAAACAGGACTTGGAGCAGC       | ATGTTTGCCATCTCAGGTCC      |
| GAPDH   | CCAAGGTCATCCATGACAACTTTGGT | TGTTGAAGTCAGAGGAGACCACCTG |

### *RNA isolation and RNA-seq analysis pipeline*

Library preparation and mRNA sequencing were performed using protocols described previously[2]. In addition, all samples were genotyped using the Illumina ImmunoChip platform, and imputation was carried out with the MaCH-admix software[3]. Personalized genomes for each sample were created by incorporating known genetic variation from each individual. Paired-end 50-bp mRNA reads for each sample were then aligned to the corresponding personalized genome using GSNAP[4], with a kmer size of 15, two allowed mismatches per read, RefSeq splice site annotations, and the -v option for specifying heterozygous sites. A post-alignment blacklist step was used to filter reads that were aligned to problematic, highly-artefactual regions identified by ENCODE. This "allele-aware" alignment approach has been shown to greatly reduce mapping biases that arise due to discrepancies in genetic variation between an individual and the reference genome[5], and leads to a more accurate read count quantification.

Post-alignment quantification of RPKM values was conducted using an in-house script with RefSeq gene annotations, yielding a full set of 23,679 genes. Of these, a total of 14,873 genes were retained for differential expression analyses using the criteria that at least 10 samples had a RPKM > 1. Prior to analysis, RPKM values were incremented with a pseudocount of 1 and log normalized. Differentially expressed genes were called using DEseq[6] on raw counts for all genes, using an FDR cutoff of 0.05. Significance of overlap between previously published colon and ileum marker genes (947 genes) and differentially expressed genes between ileum-like and colon-like CD patients (849 genes) was determined using a hypergeometric test. A total of 106 genes overlapped between those up-regulated in colon-like patients (315 genes) and normal colon tissue (531 genes), and 183 genes overlapped between those up-regulated in ileum-like patients (534 genes) and normal ileum tissue (416 genes). Using 23,348 genes tested for differential expression as the population size,  $P(X \geq 106) = 2.67601007597266e-95$  for the colon-like overlap, and  $P(X \geq 183) = 4.090042811222961e-195$  for the ileum-like overlap.

Pediatric Crohn's disease expression data from ileal tissue was processed into RPKM as described previously[7], and downloaded from GEO (accession number GSE57945). A pseudocount of 1 and log normalization was applied to the pediatric

RPKM values, as described for the adult data. For joint analysis of pediatric ileal and adult colon expression data, we restricted to genes present in both data sets (22,525), and removed any genes highly expressed in one data set (mean RPKM > 5) but lowly expressed in the other (mean RPKM < 1), leading to a total of 21,881 genes. We then applied an additional quantile normalization step to the merged data matrix.

#### *Principal components analysis*

PCA analysis on adult individuals was performed using the log normalized RPKM values and the `prcomp` function in R. For the merged data matrix, the filtered, quantile-normalized set consisting of 21,881 genes was supplied to the `prcomp` function. For PCA analysis that included only pediatric individuals, `prcomp` was applied to the same set of 21,881 genes, using the log normalized RPKM values (prior to quantile normalization).

#### *FAIRE and FAIRE-seq analysis pipeline*

FAIRE was performed as described previously[1]. 50 bp single-end sequences were generated at UNC-CH HTSF using the Illumina HiSeq 2000 platform. Reads were filtered requiring a quality score of 20 or greater in at least 90 percent of nucleotides, and adapter contaminated reads were removed with TagDust[8]. Additionally, no more than 5 reads with identical sequence were retained. Non-filtered reads were aligned with SNP-tolerant GSNAP software[4] to personalized genomes, constructed as described above using k-mer size of 15 and allowing 1 mismatch per read. Post-alignment blacklist filtering was performed as described for RNA-seq reads.

The full genome was tiled into 300 bp windows overlapping by 100bp, and raw FAIRE-seq read overlaps were computed for each region. Windows overlapping with simple and low complexity repeat regions (as defined by RepeatMasker and downloaded from UCSC table browser) and the ENCODE DAC blacklist regions were masked from downstream analysis. Window counts were normalized by total aligned read counts for each sample, and batch effect correction was performed in R using ComBat[9].

Peaks were called using F-seq[10] with a feature size of 500 (-l option) and a user-supplied -bff background file for sequences of 50bp. A union set of peaks was created separately for each CD subclass (ileum-like and colon-like). A set of consistent peaks, defined as those peaks annotated in at least 30% of samples within a CD subclass, were created for each subclass. Peaks within 10bp were merged using the bedtools merge command with the -d 10 option, yielding a final union set of peaks for each CD subclass. To perform PCA, we first computed FAIRE signal at sliding 300-bp windows across the genome whose average normalized batch-corrected FAIRE signal was within a range of 10 to 100 and standard deviation exceeded 0.15. Resulting windows were then log<sub>10</sub>-transformed and median-centered. Differentially accessible regions (DARs) were identified using a two-sided t-test performed on normalized window counts for all 300 bp windows that intersected a peak in the consistent peak set for the two subclasses, as we have published previously[11]. When necessary, a single representative 300 bp window was selected from a group of overlapping 300 bp windows, where all were identified as a DAR, by selecting the 300 bp window with highest overall signal.

To compute the enrichment of DARs near differentially expressed genes, first the number of DARs falling within 50kb of a differentially expressed gene was recorded. To determine significance, we randomly created 1,000 sets of 300 bp windows taken from the consistent peaks for each subclass, where each random set consisted of the same number of windows as the computed set of DARs. For each of the 1,000 permutation sets, the number of windows falling within 50kb of a differentially expressed gene was

recorded. Significance was calculated empirically, by determining the number of permutation sets with a co-localization rate that exceeded the observed rate among the true DARs.

#### *GWAS loci enrichment permutation*

SNPs significantly associated with CD were downloaded from the NHGRI GWAS catalogue. In addition to the 163 tag SNPs represented in the catalogue, we included any SNP in high linkage disequilibrium ( $r^2 > 0.8$ ), yielding a total of 3,179 disease-linked SNPs. We computed overlap between DARs and SNPs using bedtools [12]. For comparison with the observed overlap and to determine empirical significance, we created 1,000 sets of non-disease associated SNPs. Each null SNP set was created by first mapping the 163 tag SNPs to a randomly chosen, similarly-annotated non-disease linked SNP, based on high concordance of number of LD buddies ( $r^2 > 0.8$ ), distance to nearest TSS, distance to nearest TES, and whether the SNP was in a gene and/or exon. The seed sets were subsequently expanded to include all highly linked SNPs ( $r^2 > 0.8$ ), and were then overlapped with DARs using bedtools. The resulting overlap rates represent the null distribution expected under random chance, and was used to determine the statistical significance of the observed overlap statistic. P-values were computed by taking the number of times the overlap of a permuted set exceeded that of the observed set and multiplying by two to reflect a two-tailed distribution.

#### *ChIP-seq analysis*

Aligned ChIP-seq reads for histone marks H3K27ac, H3K27me3, H3K36me3, H3K4me1, H3K4me3, and H3K9me3 were downloaded from the Epigenome Roadmap project data portal[13], for both colonic mucosa and small intestinal tissue. Base pair resolution ChIP-seq signal was computed for 3 kb windows centered at the midpoint of DARs in the two CD subclasses. This signal was calculated by tallying the number aligned ChIP-seq reads overlapping each base pair for each DAR in a subclass, normalizing by sequencing depth of the ChIP-seq data set, and aggregating by the mean normalized read count across all DARs.

#### *Selection of colon and ileum marker genes*

For the pediatric samples, we selected the 50 pediatric ileum samples each that were most colon-like and most ileum-like based on the PCA (**Figure 2A**, second PC). Then, for each of the 947 genes previously identified to be differentially expressed between colon and ileum[14], we computed the standard deviation in normalized expression values across non-IBD, colon-like CD, and ileum-like CD samples in the adult and pediatric cohorts. We retained the top 500 most variably expressed genes and plotted their expression in these samples in **Figure 2B**.

#### *Pathway Analysis*

Pathway-level enrichments were calculated using GSAA (<http://gsaa.unc.edu>) [15, 16]. For RNA-seq data, genes were first ranked based on differential expression between samples from two classes (i.e. CD vs non-IBD) based on the t-statistics from the differential gene expression tests. The ranked list of t-statistics was input to GSAA, using the pre-ranked analysis option.

In order to create a chromatin-based score for each gene, we mapped all DARs within 100 kb of a gene's promoter to that gene, and then selected the most extreme t-statistic as the score for that gene. Genes not within 100 kb of any DAR were assigned scores of zero. In order to reduce cases of a gene being mapped to differential FAIRE-

seq signal in a nearby gene's promoter region (which is likely to represent a false positive), we took the additional step of masking all other gene's promoters when computing each gene's score. Gene scores were then input to GSAA as an ordered list, using the pre-ranked option.

Pathway enrichment was calculated for genesets derived from the Reactome Pathway Database (<http://www.reactome.org/>) [17]. Genesets with < 15 and > 500 genes were not considered. Genesets with an FDR < 0.1 based on 2,000 permutations across all genes were considered significantly enriched.

To visualize pathways that were significantly enriched for a given contrast (FDR 5%), multidimensional scaling was used to find an optimal 2D arrangement of pathways based on a distance matrix of between-pathway semantic scores. Semantic scores were calculated using the *makeDendrogram.py* script of the python package pyEnrichment (<https://github.com/ofedrigo/pyEnrichment>, last accessed May 2016) and pathways were plotted using in-house R scripts.

## Supplementary Figures

**Supplementary Figure 1. Colon-like and ileum-like CD subclasses are demarcated by different tissue-specific histone modifications and enhancers and exhibit enhancer activity.** **A.** qRT-PCR for *CEACAM7* (colon marker) and *APOA1* (ileum marker) expression in colon-like (n=11) and ileum-like (n=10) CD samples. P-values were computed using a two-sided t-test. **B.** Average normalized ChIP-seq enrichment for histone modifications detected in colonic mucosa (top) and small intestine (bottom) by the Epigenome Roadmap Consortium around colon-specific and ileum-specific regions of differential chromatin accessibility. **C.** Unsupervised principal components analysis (PCA) of normalized batch-corrected FAIRE-seq signal at sliding 300-bp windows with variable chromatin accessibility across samples. **D.** Luciferase activity normalized to empty vector controls for three regions of differential chromatin accessibility, cloned in both forward and reverse orientations.

**Supplementary Figure 2. PCA analysis of pediatric CD patients reveals two disease subclasses in the ileum.** Principal components 1 vs 2 (left) and 1 vs 3 (right) demonstrate that non-IBD and ileum-like CD samples group together, but that a separate group of colon-like samples segregate.

**Supplementary Figure 3.** Pathway-level enrichments for CD vs non-IBD controls in adult (colon tissue) and pediatric (ileum tissue) patients.

**Supplementary Figure 4. Characterization and annotation of REACTOME pathways that were significantly differentially regulated between colon-like CD, ileum-like CD, and non-IBD samples from both adult and pediatric cohorts.** Pathway sizes, categories based on direction of expression change, and broad annotation class labels are provided.

Supplement figure 1

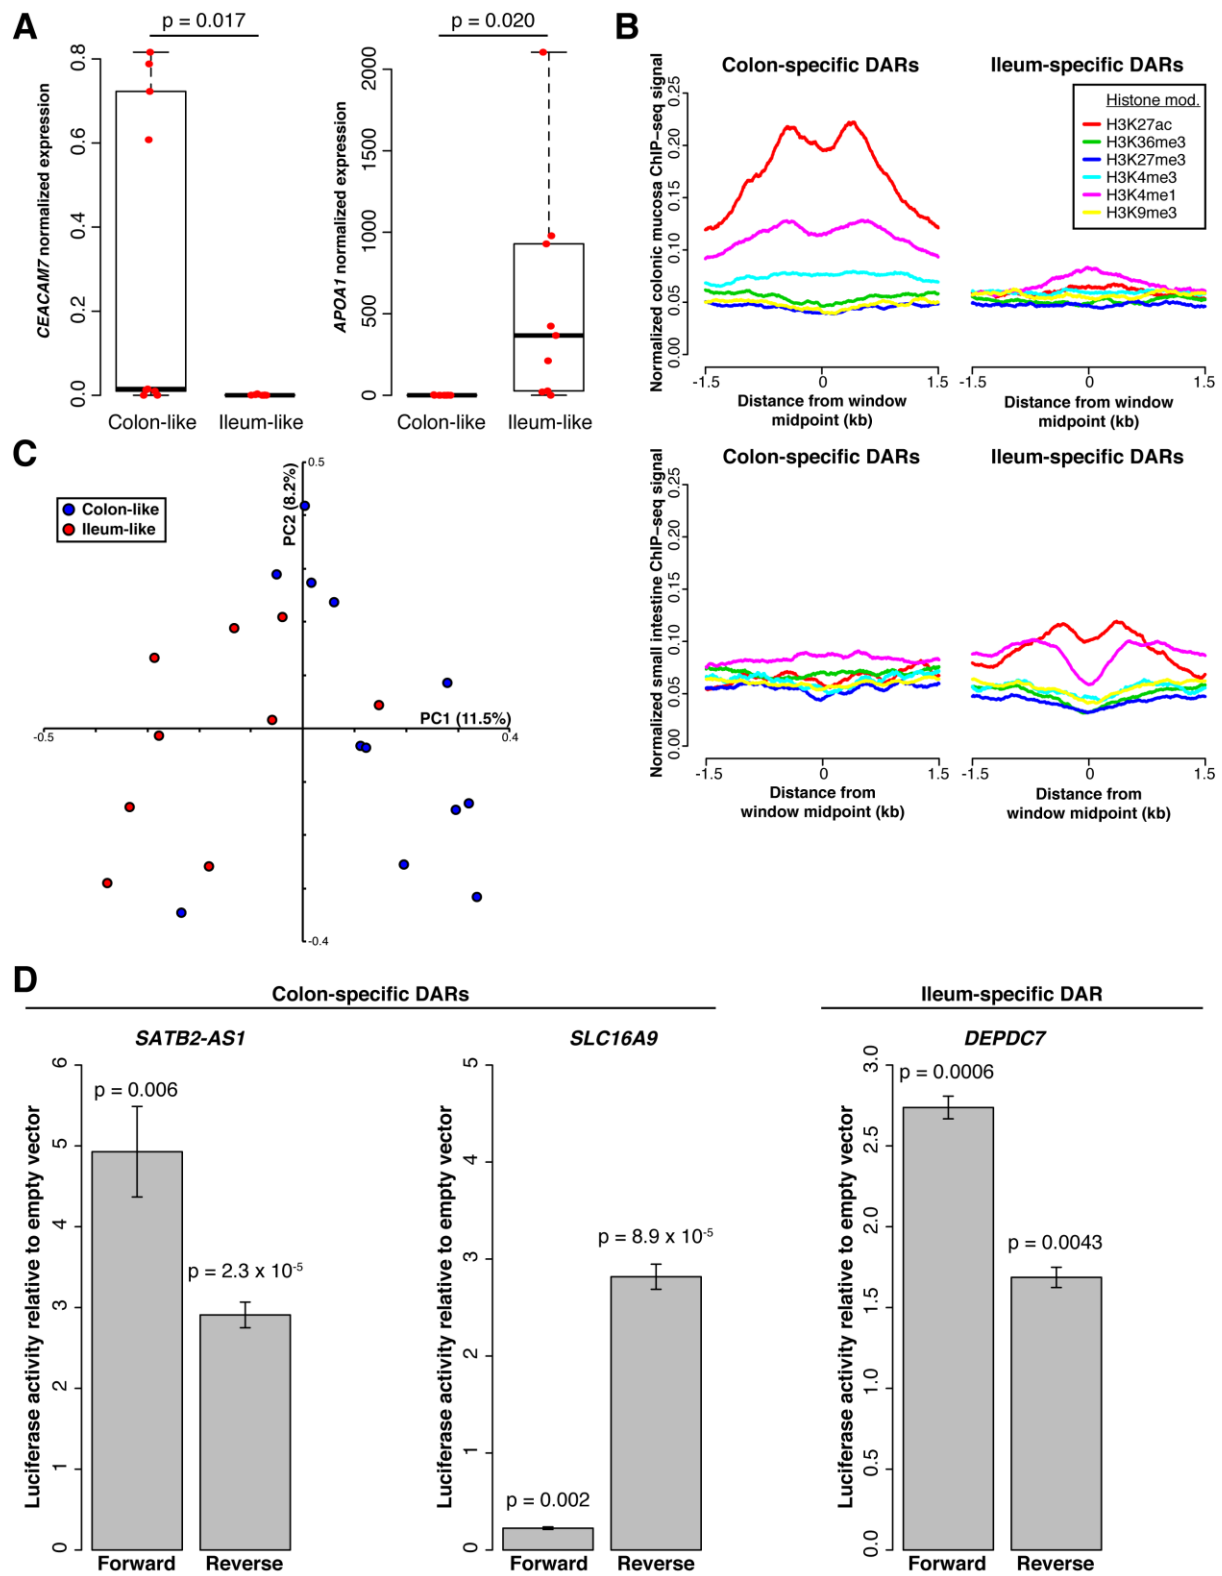



Supplement figure 2

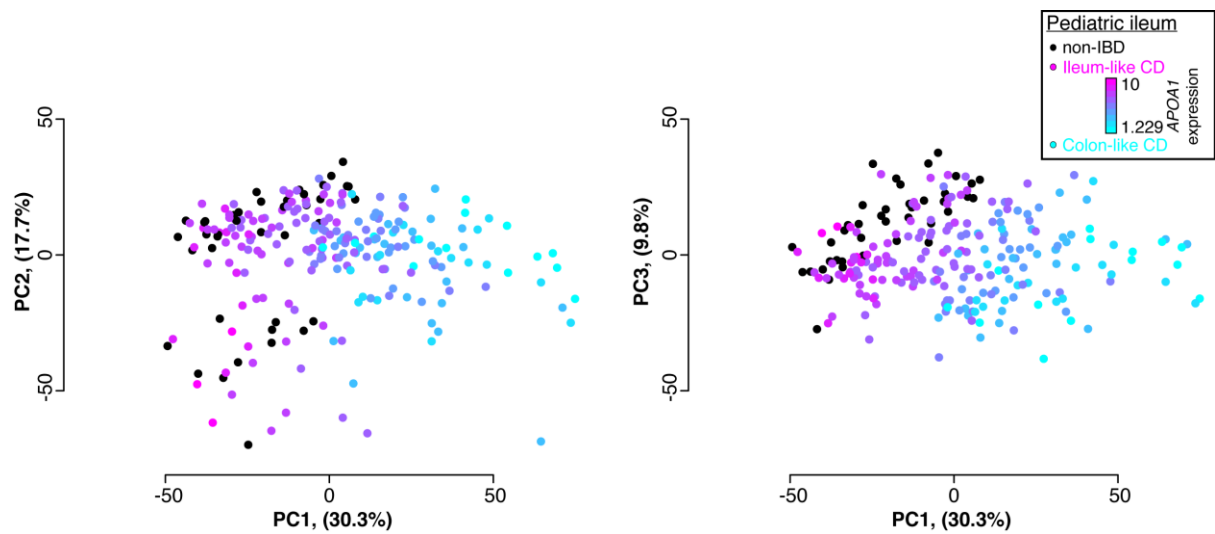

Supplement figure 3

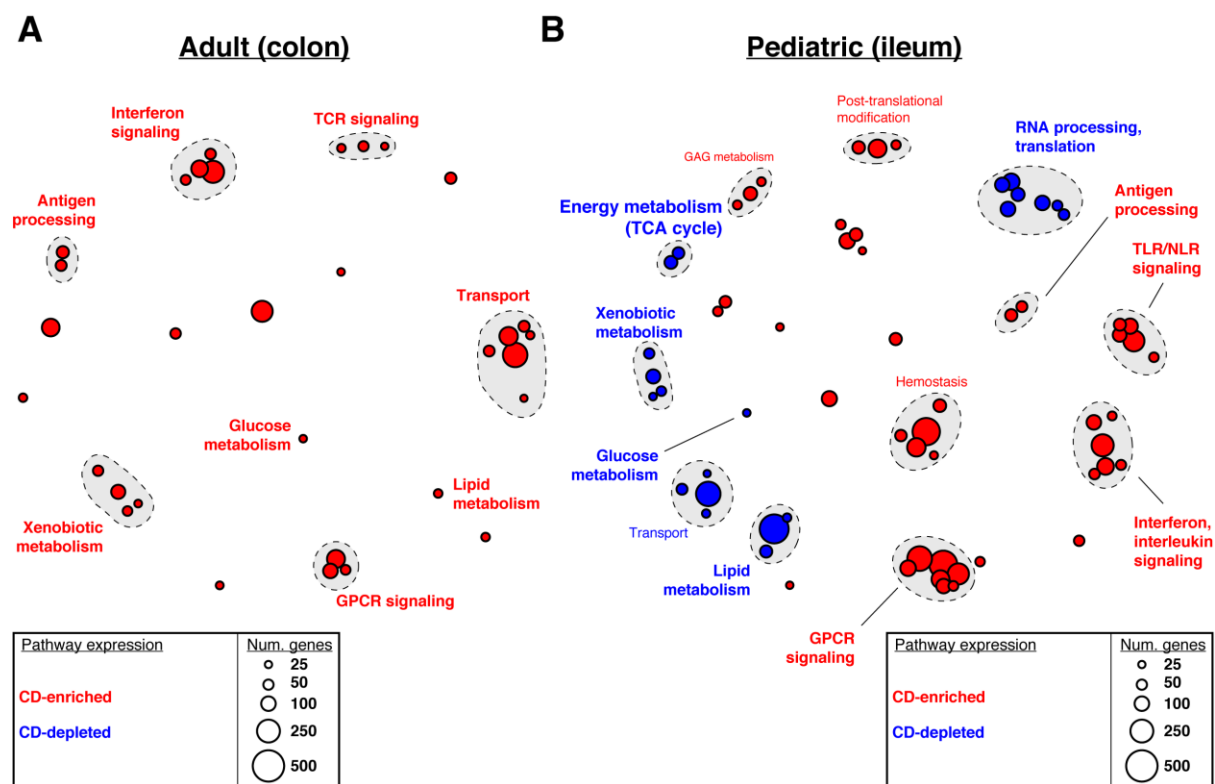



## Supplement figure 4

| Pathway                                                                                                                  | Number of Genes | Adult Category<br>CD vs non-IBD | Pediatric Category<br>CD vs non-IBD | Adult Category<br>Ileum-like vs Colon-like | Pediatric Category<br>Ileum-like vs Colon-like | Broad Pathway Description       |
|--------------------------------------------------------------------------------------------------------------------------|-----------------|---------------------------------|-------------------------------------|--------------------------------------------|------------------------------------------------|---------------------------------|
| REACTOME_ANTIGEN_PROCESSING_CROSS_PRESENTATION                                                                           | 71              | CD-enriched                     | CD-enriched                         |                                            | CL-enriched                                    | Antigen Processing              |
| REACTOME_ER_PHAGOSOME_PATHWAY                                                                                            | 57              | CD-enriched                     | CD-enriched                         |                                            |                                                | Antigen Processing              |
| REACTOME_RESPIRATORY_ELECTRON_TRANSPORT_ATP_SYNTHESIS_BY_CHEMOSMOTIC_COUPLING_AND_HEAT_PRODUCTION_BY_UNCOUPLING_PROTEINS | 79              |                                 | CD-depleted                         | CL-enriched/IL-depleted                    | IL-enriched/CL-depleted                        | Energy Metabolism               |
| REACTOME_RESPIRATORY_ELECTRON_TRANSPORT                                                                                  | 65              |                                 | CD-depleted                         | CL-enriched/IL-depleted                    | IL-enriched/CL-depleted                        | Energy Metabolism               |
| REACTOME_TCA_CYCLE_AND_RESPIRATORY_ELECTRON_TRANSPORT                                                                    | 114             |                                 |                                     | CL-enriched/IL-depleted                    | IL-enriched/CL-depleted                        | Energy Metabolism               |
| REACTOME_PYRUVATE_METABOLISM_AND_CITRIC_ACID_TCA_CYCLE                                                                   | 39              |                                 |                                     |                                            | IL-enriched/CL-depleted                        | Energy Metabolism               |
| REACTOME_CHONDROITIN_SULFATE_DERMATAN_SULFATE_METABOLISM                                                                 | 39              |                                 | CD-enriched                         |                                            | CL-enriched                                    | GAG Metabolism                  |
| REACTOME_GLYCOSAMINOGLYCAN_METABOLISM                                                                                    | 86              |                                 | CD-enriched                         |                                            | CL-enriched                                    | GAG Metabolism                  |
| REACTOME_HEPARAN_SULFATE_HEPARIN_HS_GAG_METABOLISM                                                                       | 37              |                                 | CD-enriched                         |                                            | CL-enriched                                    | GAG Metabolism                  |
| REACTOME_GLUCCONEOGENESIS                                                                                                | 27              | CD-enriched                     | CD-depleted                         |                                            | CL-depleted                                    | Glucose Metabolism              |
| REACTOME_GLUCCOSE_METABOLISM                                                                                             | 55              |                                 |                                     |                                            | IL-enriched/CL-depleted                        | Glucose Metabolism              |
| REACTOME_CHEMOKINE_RECEPTORS_BIND_CHEMOKINES                                                                             | 46              | CD-enriched                     | CD-enriched                         | IL-enriched                                | CL-enriched                                    | GPCR Signaling                  |
| REACTOME_PEPTIDE_LIGAND_BINDING_RECEPTORS                                                                                | 101             | CD-enriched                     | CD-enriched                         | IL-enriched                                | CL-enriched                                    | GPCR Signaling                  |
| REACTOME_CLASS_A1_RHOGRPSIN_LIKE_RECEPTORS                                                                               | 154             | CD-enriched                     | CD-enriched                         | IL-enriched                                | CL-enriched                                    | GPCR Signaling                  |
| REACTOME_GPCR_LIGAND_BINDING                                                                                             | 215             |                                 | CD-enriched                         | IL-enriched                                | CL-enriched                                    | GPCR Signaling                  |
| REACTOME_G_ALPHA_I_SIGNALLING_EVENTS                                                                                     | 117             |                                 | CD-enriched                         |                                            | CL-enriched                                    | GPCR Signaling                  |
| REACTOME_SIGNALING_BY_GPCR                                                                                               | 373             |                                 | CD-enriched                         |                                            | CL-enriched                                    | GPCR Signaling                  |
| REACTOME_GPCR_DOWNSTREAM_SIGNALING                                                                                       | 291             |                                 | CD-enriched                         |                                            | CL-enriched                                    | GPCR Signaling                  |
| REACTOME_PLATELET_ACTIVATION_SIGNALING_AND_AGGREGATION                                                                   | 163             |                                 | CD-enriched                         |                                            | CL-enriched                                    | Hemostasis                      |
| REACTOME_RESPONSE_TO_ELEVATED_PLATELET_CYTOSOLIC_CALC                                                                    | 63              |                                 | CD-enriched                         |                                            | CL-enriched                                    | Hemostasis                      |
| REACTOME_HEMOSTASIS                                                                                                      | 358             |                                 | CD-enriched                         |                                            | CL-enriched                                    | Hemostasis                      |
| REACTOME_GPIIb_MEDIATED_ACTIVATION_CASCADE                                                                               | 91              |                                 | CD-enriched                         |                                            | CL-enriched/IL-depleted                        | Hemostasis                      |
| REACTOME_INTERFERON_GAMMA_SIGNALING                                                                                      | 54              | CD-enriched                     | CD-enriched                         |                                            | CL-enriched                                    | Interferon Signaling            |
| REACTOME_INTERFERON_ALPHA_BETA_SIGNALING                                                                                 | 48              | CD-enriched                     | CD-enriched                         |                                            | CL-enriched                                    | Interferon Signaling            |
| REACTOME_INTERFERON_SIGNALING                                                                                            | 134             | CD-enriched                     | CD-enriched                         |                                            | CL-enriched                                    | Interferon Signaling            |
| REACTOME_CYTOKINE_SIGNALING_IN_IMMUNE_SYSTEM                                                                             | 254             | CD-enriched                     | CD-enriched                         |                                            | CL-enriched                                    | Interleukin Signaling           |
| REACTOME_SIGNALING_BY_IL5                                                                                                | 101             |                                 | CD-enriched                         |                                            | CL-enriched                                    | Interleukin Signaling           |
| REACTOME_IL1_SIGNALING                                                                                                   | 38              |                                 | CD-enriched                         |                                            | CL-enriched                                    | Interleukin Signaling           |
| REACTOME_IL3_5_AND_GM-CSF_SIGNALING                                                                                      | 39              |                                 |                                     |                                            | CL-enriched/IL-depleted                        | Interleukin Signaling           |
| REACTOME_IL2_SIGNALING                                                                                                   | 37              |                                 |                                     |                                            | CL-enriched/IL-depleted                        | Interleukin Signaling           |
| REACTOME_LIPID_DIGESTION_MILITIZATION_AND_TRANSPORT                                                                      | 35              | CD-enriched                     | CD-depleted                         | IL-enriched                                | CL-depleted                                    | Lipid Metabolism                |
| REACTOME_METABOLISM_OF_LIPIDS_AND_LIPOPROTEINS                                                                           | 403             |                                 | CD-depleted                         | IL-enriched                                | CL-depleted                                    | Lipid Metabolism                |
| REACTOME_GLYCEROPHOSPHOLIPID_BIOSYNTHESIS                                                                                | 71              |                                 | CD-depleted                         |                                            | CL-depleted                                    | Lipid Metabolism                |
| REACTOME_FATTY_ACID_TRIACYLGLYCEROL_AND_KEONE_BODY_METABOLISM                                                            | 154             |                                 |                                     |                                            | CL-depleted                                    | Lipid Metabolism                |
| REACTOME_PHOSPHOLIPID_METABOLISM                                                                                         | 171             |                                 |                                     |                                            | CL-depleted                                    | Lipid Metabolism                |
| REACTOME_INNATE_IMMUNE_SYSTEM                                                                                            | 212             | CD-enriched                     | CD-enriched                         |                                            | CL-enriched                                    | NOD/TLR Signaling               |
| REACTOME_TOLL_RECEPTOR_CASCADES                                                                                          | 113             |                                 | CD-enriched                         |                                            | CL-enriched                                    | NOD/TLR Signaling               |
| REACTOME_ACTIVATED_TLR4_SIGNALLING                                                                                       | 90              |                                 | CD-enriched                         |                                            | CL-enriched                                    | NOD/TLR Signaling               |
| REACTOME_NUCLEOTIDE_BINDING_DOMAIN_LEUCINE_RICH_REPEAT_CONTAINING_RECEPTOR_NLR_SIGNALING_PATHWAYS                        | 44              |                                 | CD-enriched                         |                                            | CL-enriched                                    | NOD/TLR Signaling               |
| REACTOME_NFKB_AND_MAP_KINASES_ACTIVATION_MEDIATED_BY_TLR4_SIGNALING_REPERTOIRE                                           | 70              |                                 | CD-enriched                         |                                            | CL-enriched                                    | NOD/TLR Signaling               |
| REACTOME_MYD88_MAL_CASCADE_INITIATED_ON_PLASMA_MEMBRANE                                                                  | 80              |                                 | CD-enriched                         |                                            | CL-enriched                                    | NOD/TLR Signaling               |
| REACTOME_TRIF_MEDIATED_TLR3_SIGNALING                                                                                    | 72              |                                 | CD-enriched                         |                                            | CL-enriched                                    | NOD/TLR Signaling               |
| REACTOME_NOD1_2_SIGNALING_PATHWAY                                                                                        | 29              |                                 |                                     |                                            | CL-enriched                                    | NOD/TLR Signaling               |
| REACTOME_O_LINKED_GLYCOSYLATION_OF_MUCINS                                                                                | 41              |                                 | CD-enriched                         |                                            |                                                | Post-translational Modification |
| REACTOME_POST_TRANSLATIONAL_PROTEIN_MODIFICATION                                                                         | 155             |                                 | CD-enriched                         |                                            |                                                | Post-translational Modification |
| REACTOME_ASPARAGINE_N_LINKED_GLYCOSYLATION                                                                               | 76              |                                 | CD-enriched                         |                                            |                                                | Post-translational Modification |
| REACTOME_3_UTR_MEDIATED_TRANSLATIONAL_REGULATION                                                                         | 102             | CD-depleted                     | CD-depleted                         | IL-depleted                                | IL-depleted                                    | RNA Processing, Translation     |
| REACTOME_PEPTIDE_CHAIN_ELONGATION                                                                                        | 83              | CD-depleted                     | CD-depleted                         | IL-depleted                                | IL-depleted                                    | RNA Processing, Translation     |
| REACTOME_INFLUENZA_LIFE_CYCLE                                                                                            | 133             | CD-depleted                     | CD-depleted                         | IL-depleted                                | IL-depleted                                    | RNA Processing, Translation     |
| REACTOME_TRANSLATION                                                                                                     | 142             |                                 |                                     | IL-depleted                                | IL-depleted                                    | RNA Processing, Translation     |
| REACTOME_METABOLISM_OF_RNA                                                                                               | 251             |                                 |                                     | IL-depleted                                | IL-depleted                                    | RNA Processing, Translation     |
| REACTOME_SRP_DEPENDENT_COTRANSLATIONAL_PROTEIN_TARGETING_TO_MEMBRANE                                                     | 106             |                                 |                                     | IL-depleted                                | IL-depleted                                    | RNA Processing, Translation     |
| REACTOME_INFLUENZA_VIRAL_RNA_TRANSCRIPTION_AND_REPLICATION                                                               | 99              |                                 | CD-depleted                         | IL-depleted                                |                                                | RNA Processing, Translation     |
| REACTOME_NONSENSE_MEDIATED_DECAY_ENHANCED_BY_THE_EXON_JUNCTION_COMPLEX                                                   | 104             |                                 | CD-depleted                         | IL-depleted                                |                                                | RNA Processing, Translation     |
| REACTOME_FORMATION_OF_THE_TERNARY_COMPLEX_AND_SUBSEQUENTLY_THE_43S_COMPLEX                                               | 48              |                                 | CD-depleted                         | IL-depleted                                |                                                | RNA Processing, Translation     |
| REACTOME_ACTIVATION_OF_THE_MRNA_UPON_BINDING_OF_THE_CAP_BINDING_COMPLEX_AND_EFS_AND_SUBSEQUENT_BINDING_TO_43S            | 55              |                                 | CD-depleted                         | IL-depleted                                |                                                | RNA Processing, Translation     |
| REACTOME_METABOLISM_OF_NON_CODING_RNA                                                                                    | 48              |                                 |                                     |                                            | IL-depleted                                    | RNA Processing, Translation     |
| REACTOME_TRANSPORT_OF_MATURE_TRANSCRIPT_TO_CYTOPLASM                                                                     | 52              |                                 |                                     |                                            | IL-depleted                                    | RNA Processing, Translation     |
| REACTOME_TRANSPORT_OF_MATURE_MRNA_DERIVED_FROM_AN_INTRONLESS_TRANSCRIPT                                                  | 32              |                                 |                                     |                                            | IL-depleted                                    | RNA Processing, Translation     |
| REACTOME_IMMUNOREGULATORY_INTERACTIONS_BETWEEN_A_LYMPHOID_AND_A_NON_LYMPHOID_CELL                                        | 62              | CD-enriched                     | CD-enriched                         | IL-enriched                                | IL-enriched                                    | TCR/BCR Signaling               |
| REACTOME_COSTIMULATION_BY_THE_CD28_FAMILY                                                                                | 51              | CD-enriched                     | CD-enriched                         | IL-enriched                                | IL-enriched                                    | TCR/BCR Signaling               |
| REACTOME_CD28_CD28_STIMULATION                                                                                           | 31              |                                 |                                     | IL-enriched                                | IL-enriched                                    | TCR/BCR Signaling               |
| REACTOME_ADAPTIVE_IMMUNE_SYSTEM                                                                                          | 472             |                                 |                                     | IL-enriched                                | IL-enriched                                    | TCR/BCR Signaling               |
| REACTOME_TCR_SIGNALING                                                                                                   | 50              | CD-enriched                     |                                     | IL-enriched/IL-depleted                    | IL-enriched/IL-depleted                        | TCR/BCR Signaling               |
| REACTOME_GENERATION_OF_SECOND_MESSENGER_MOLECULES                                                                        | 25              | CD-enriched                     |                                     | IL-depleted                                | IL-depleted                                    | TCR/BCR Signaling               |
| REACTOME_ANTIGEN_ACTIVATES_B_CELL_RECEPTOR_LEADING_TO_GENERATION_OF_SECOND_MESSENGERS                                    | 29              |                                 |                                     | IL-depleted                                | IL-depleted                                    | TCR/BCR Signaling               |
| REACTOME_SIGNALING_BY_THE_B_CELL_RECEPTOR_BCR                                                                            | 120             |                                 |                                     | IL-depleted                                | IL-depleted                                    | TCR/BCR Signaling               |
| REACTOME_DOWNSTREAM_TCR_SIGNALING                                                                                        | 35              | CD-enriched                     |                                     |                                            |                                                | TCR/BCR Signaling               |
| REACTOME_TRANSPORT_OF_GLUCCOSE_AND_OTHER_SUGARS_BILE_SALTS_AND_ORGANIC_ACIDS_METAL_IONS_AND_AMINE_COMPOUNDS              | 57              | CD-enriched                     | CD-depleted                         | IL-enriched                                | CL-depleted                                    | Transport                       |
| REACTOME_TRANSMEMBRANE_TRANSPORT_OF_SMALL_MOLECULES                                                                      | 286             | CD-enriched                     | CD-depleted                         | IL-enriched                                | CL-depleted                                    | Transport                       |
| REACTOME_ABC_FAMILY_PROTEINS_MEDIATED_TRANSPORT                                                                          | 25              |                                 | CD-depleted                         | IL-enriched                                | CL-depleted                                    | Transport                       |
| REACTOME_AMINO_ACID_AND_OLIGOPEPTIDE_SLC_TRANSPORTERS                                                                    | 33              | CD-enriched                     | CD-depleted                         |                                            |                                                | Transport                       |
| REACTOME_TRANSPORT_OF_INORGANIC_CATIONS_ANIONS_AND_AMINO_ACIDS_OLIGOPEPTIDES                                             | 59              | CD-enriched                     |                                     | IL-enriched                                |                                                | Transport                       |
| REACTOME_SLC_MEDIATED_TRANSMEMBRANE_TRANSPORT                                                                            | 162             | CD-enriched                     |                                     | IL-enriched                                |                                                | Transport                       |
| REACTOME_ABC_FAMILY_PROTEINS_MEDIATED_TRANSPORT                                                                          | 25              | CD-enriched                     |                                     | IL-enriched                                |                                                | Transport                       |
| REACTOME_MITOCHONDRIAL_PROTEIN_IMPORT                                                                                    | 42              |                                 |                                     | IL-depleted                                |                                                | Uncategorized                   |
| REACTOME_TRNA_AMINOACYLATION                                                                                             | 42              |                                 |                                     | IL-depleted                                |                                                | Uncategorized                   |
| REACTOME_ENDOSOMAL_SORTING_COMPLEX_REQUIRED_FOR_TRANSPORT_ESCRT                                                          | 26              |                                 |                                     |                                            | CL-depleted                                    | Uncategorized                   |
| REACTOME_EXTRACELLULAR_MATRIX_ORGANIZATION                                                                               | 66              |                                 | CD-enriched                         |                                            | CL-enriched                                    | Uncategorized                   |
| REACTOME_INTEGRIN_CELL_SURFACE_INTERACTIONS                                                                              | 71              |                                 | CD-enriched                         |                                            | CL-enriched                                    | Uncategorized                   |
| REACTOME_UNFOLDED_PROTEIN_RESPONSE                                                                                       | 77              |                                 | CD-enriched                         |                                            | CL-enriched                                    | Uncategorized                   |
| REACTOME_NCAM1_INTERACTIONS                                                                                              | 28              |                                 | CD-enriched                         |                                            | CL-enriched                                    | Uncategorized                   |
| REACTOME_LATENT_INFECTION_OF_HOMO_SAPIENS_WITH_MYCOBACTERIUM_TUBERCULOSIS                                                | 26              |                                 | CD-enriched                         |                                            | CL-enriched                                    | Uncategorized                   |
| REACTOME_CELL_SURFACE_INTERACTIONS_AT_THE_VASCULAR_WALL                                                                  | 77              |                                 | CD-enriched                         |                                            | CL-enriched                                    | Uncategorized                   |
| REACTOME_PERK_REGULATED_GENE_EXPRESSION                                                                                  | 26              |                                 | CD-enriched                         |                                            | CL-enriched                                    | Uncategorized                   |
| REACTOME_NCAM_SIGNALING_FOR_NEURITE_OUT_GROWTH                                                                           | 48              |                                 |                                     |                                            | CL-enriched                                    | Uncategorized                   |
| REACTOME_APC_C_CDC20_MEDIATED_DEGRADATION_OF_MITOTIC_PROTEINS                                                            | 64              |                                 |                                     |                                            | CL-enriched                                    | Uncategorized                   |
| REACTOME_COLLAGEN_FORMATION                                                                                              | 44              |                                 | CD-enriched                         |                                            | CL-enriched/IL-depleted                        | Uncategorized                   |
| REACTOME_THE_ROLE_OF_NEP_IN_HIV1_REPLICATION_AND_DISEASE_PATHOGENESIS                                                    | 27              | CD-enriched                     |                                     |                                            | IL-depleted                                    | Uncategorized                   |
| REACTOME_NEP_NS2_INTERACTS_WITH_THE_CELLULAR_EXPORT_MACHINERY                                                            | 27              |                                 |                                     |                                            | IL-depleted                                    | Uncategorized                   |
| REACTOME_TRANSPORT_OF_RIBONUCLEOPROTEINS_INTO_THE_HOST_NUCLEUS                                                           | 27              |                                 |                                     |                                            | IL-depleted                                    | Uncategorized                   |
| REACTOME_REGULATION_OF_GLUCCOKINASE_BY_GLUCCOKINASE_REGULATORY_PROTEIN                                                   | 25              |                                 |                                     |                                            | IL-depleted                                    | Uncategorized                   |
| REACTOME_CELL_CYCLE_CHECKPOINTS                                                                                          | 109             |                                 |                                     |                                            | IL-depleted                                    | Uncategorized                   |
| REACTOME_NUCLEAR_RECEPTOR_TRANSCRIPTION_PATHWAY                                                                          | 35              | CD-enriched                     |                                     |                                            | IL-enriched/CL-depleted                        | Uncategorized                   |
| REACTOME_TRIGLYCERIDE_BIOSYNTHESIS                                                                                       | 34              | CD-enriched                     |                                     |                                            |                                                | Uncategorized                   |
| REACTOME_METABOLISM_OF_AMINO_ACIDS_AND_DERIVATIVES                                                                       | 149             | CD-enriched                     |                                     |                                            |                                                | Uncategorized                   |
| REACTOME_TRANSPORT_TO_THE_GOLGI_AND_SUBSEQUENT_MODIFICATION                                                              | 29              | CD-enriched                     |                                     |                                            |                                                | Uncategorized                   |
| REACTOME_DIABETES_PATHWAYS                                                                                               | 114             |                                 | CD-enriched                         |                                            |                                                | Uncategorized                   |
| REACTOME_CLASS_B_2_SECRETIN_FAMILY_RECEPTORS                                                                             | 43              |                                 | CD-enriched                         |                                            |                                                | Uncategorized                   |
| REACTOME_SIGNALING_BY_PDGFR                                                                                              | 110             |                                 | CD-enriched                         |                                            |                                                | Uncategorized                   |
| REACTOME_ACTIVATION_OF_CHAPERONE_GENES_BY_XBP1S                                                                          | 46              |                                 | CD-enriched                         |                                            |                                                | Uncategorized                   |
| REACTOME_PHASE1_FUNCTIONALIZATION_OF_COMPOUNDS                                                                           | 44              | CD-enriched                     | CD-depleted                         | IL-enriched                                | CL-depleted                                    | Xenobiotic Metabolism           |
| REACTOME_CYTOCHROME_P450_ARRANGED_BY_SUBSTRATE_TYPE                                                                      | 28              | CD-enriched                     | CD-depleted                         | IL-enriched                                | CL-depleted                                    | Xenobiotic Metabolism           |
| REACTOME_BIOLOGICAL_OXIDATIONS                                                                                           | 95              | CD-enriched                     | CD-depleted                         | IL-enriched                                | IL-enriched/CL-depleted                        | Xenobiotic Metabolism           |
| REACTOME_PHASE_II_CONJUGATION                                                                                            | 51              | CD-enriched                     | CD-depleted                         | IL-enriched                                | IL-enriched/CL-depleted                        | Xenobiotic Metabolism           |

**Supplementary Table 1**

|                | Gene      | baseMean | baseMeanIL  | baseMeanCL  | log2FoldChange | FDR      |
|----------------|-----------|----------|-------------|-------------|----------------|----------|
| Colon-specific | NXPE4     | 794.7372 | 17.20361581 | 1501.58592  | 6.439365753    | 2.37E-49 |
|                | SATB2-AS1 | 129.6677 | 1.512208909 | 246.1727847 | 7.255074696    | 1.15E-41 |
|                | CWH43     | 284.0867 | 7.831195838 | 535.2280187 | 6.076740947    | 2.74E-41 |
|                | VSIG2     | 549.0849 | 22.56218639 | 1027.741953 | 5.503187579    | 3.35E-37 |
|                | CA2       | 7492.625 | 92.29712198 | 14220.19625 | 7.265887891    | 4.60E-22 |
|                | NXPE1     | 917.9078 | 128.8984973 | 1635.18905  | 3.664119501    | 6.38E-20 |
|                | B3GALT1   | 77.01145 | 2.857657527 | 144.4239827 | 5.610710097    | 1.03E-19 |
|                | GAL3ST2   | 44.51628 | 1.195573618 | 83.89874662 | 6.0187049      | 3.65E-17 |
|                | FOXD2     | 111.0708 | 17.71552037 | 195.9391437 | 3.459935222    | 1.37E-15 |
|                | CEACAM7   | 10201.14 | 77.75598868 | 19404.21291 | 7.961353618    | 2.90E-15 |
|                | LEFTY1    | 361.2523 | 9.816044775 | 680.7398663 | 6.10140692     | 2.57E-14 |
|                | SLPI      | 156.3061 | 25.78914762 | 274.9578363 | 3.409315634    | 3.44E-14 |
|                | AIFM3     | 374.2034 | 59.74500259 | 660.0746817 | 3.463545127    | 3.56E-14 |
|                | EYA2      | 135.8655 | 6.531586038 | 253.4417939 | 5.256725818    | 9.05E-13 |
|                | L1TD1     | 387.9812 | 19.28848066 | 723.1563512 | 5.221235428    | 1.56E-12 |
|                | ATP13A4   | 78.14697 | 13.87846262 | 136.5728826 | 3.28944942     | 2.05E-12 |
|                | C10orf99  | 952.5956 | 191.0196081 | 1644.937378 | 3.105572659    | 7.33E-12 |
|                | RHBDL2    | 111.8022 | 15.02319539 | 199.7831916 | 3.724322255    | 8.41E-12 |
|                | TFCP2L1   | 1317.31  | 134.4163809 | 2392.667042 | 4.15282617     | 1.77E-11 |
|                | PARM1     | 2306.327 | 550.1196899 | 3902.879409 | 2.826496178    | 3.11E-11 |
| Ileum-specific | CPS1      | 5031.883 | 10519.44911 | 43.18748184 | -7.924907277   | 7.92E-61 |
|                | CPS1-IT1  | 51.8355  | 108.5096878 | 0.313508808 | -8.037019019   | 1.33E-36 |
|                | RBP2      | 3246.114 | 6785.64995  | 28.35453319 | -7.897705947   | 8.57E-35 |
|                | CEACAM18  | 37.59547 | 78.36646426 | 0.530931261 | -6.958449548   | 2.21E-29 |
|                | HTR1D     | 82.69207 | 169.0033704 | 4.227248286 | -5.288311703   | 4.77E-29 |
|                | TM6SF2    | 426.1704 | 865.9806953 | 26.342828   | -5.033553068   | 6.39E-26 |
|                | ABCC2     | 711.8181 | 1467.356445 | 24.96514509 | -5.871491288   | 4.28E-25 |
|                | MTPP      | 7392.924 | 15471.31053 | 48.93696939 | -8.301519199   | 4.28E-25 |
|                | ALPI      | 1527.674 | 3130.771863 | 70.31215346 | -5.474596188   | 7.18E-24 |
|                | TMPRSS15  | 364.0587 | 763.2343771 | 1.171627182 | -9.229495595   | 2.23E-23 |
|                | CCL25     | 1125.929 | 2356.507326 | 7.220973255 | -8.330460217   | 2.31E-23 |
|                | SULT1E1   | 207.2398 | 427.6343316 | 6.881042843 | -5.937128632   | 1.99E-22 |
|                | GSTA2     | 525.3816 | 1095.396045 | 7.186602982 | -7.232122175   | 1.26E-21 |
|                | SLC2A2    | 1015.416 | 2127.691109 | 4.256362351 | -8.932016851   | 3.65E-21 |
|                | CREB3L3   | 1546.829 | 3204.749616 | 39.62905799 | -6.333918265   | 8.86E-20 |
|                | APOB      | 48064.94 | 100602.0138 | 303.9580369 | -8.37009818    | 1.32E-19 |
|                | GSTA1     | 3152.422 | 6542.114402 | 70.88340128 | -6.526153525   | 9.96E-18 |
|                | CLDN15    | 664.4674 | 1269.840222 | 114.1284281 | -3.474766943   | 5.50E-17 |
|                | OTC       | 646.8354 | 1253.617774 | 95.21497145 | -3.717365967   | 1.31E-16 |
|                | C19orf69  | 90.85682 | 190.2338293 | 0.514088476 | -8.275869758   | 1.38E-16 |

**Supplementary Table 1. Top 20 differentially expressed genes for each CD subclass.** The normalized mean expression level within ileum-like (IL) and colon-like (CL) subclasses, as well as log<sub>2</sub> fold-change and FDR values were generated by DEseq.

**Supplementary Table 2**

| Phenotype                                                  | Colon-like |     |     |     |     |     |     |     |     |     |     |     | Ileum-like |     |     |     |     |     |     |     |     |     |     |                                              |  |
|------------------------------------------------------------|------------|-----|-----|-----|-----|-----|-----|-----|-----|-----|-----|-----|------------|-----|-----|-----|-----|-----|-----|-----|-----|-----|-----|----------------------------------------------|--|
| Patient ID                                                 | 51         | 54  | 62  | 63  | 405 | 407 | 408 | 420 | 429 | 431 | 440 |     | 20         | 21  | 25  | 29  | 64  | 413 | 422 | 424 | 434 | 450 |     |                                              |  |
| Location                                                   |            |     |     |     |     |     |     |     |     |     |     |     |            |     |     |     |     |     |     |     |     |     |     |                                              |  |
| Ileum-only                                                 | 0          | 0   | 0   | 0   | 0   | 0   | 0   | 0   | 0   | 0   | 0   | 0   | 1          | 0   | 0   | 0   | 0   | 0   | 0   | 0   | 0   | 0   | 1   | 1=yes; 0=no                                  |  |
| Colon-only                                                 | 0          | 1   | 0   | 0   | 1   | 1   | 1   | 1   | 1   | 0   | 1   | 0   | 0          | 0   | 0   | 0   | 0   | 1   | 0   | 0   | 0   | 0   | 0   | 1=yes; 0=no                                  |  |
| Ileum+Colon                                                | 1          | 0   | 1   | 1   | 0   | 0   | 0   | 0   | 0   | 1   | 0   | 1   | 0          | 1   | 1   | 1   | 1   | 0   | 1   | 1   | 1   | 1   | 0   | 1=yes; 0=no                                  |  |
|                                                            |            |     |     |     |     |     |     |     |     |     |     |     |            |     |     |     |     |     |     |     |     |     |     |                                              |  |
| Patient Characteristics                                    |            |     |     |     |     |     |     |     |     |     |     |     |            |     |     |     |     |     |     |     |     |     |     |                                              |  |
| Age at Surgery (years)                                     | 28         | 20  | 45  | 18  | 56  | 44  | 23  | 36  | 23  | 19  | 76  |     | 13         | 49  | 59  | 47  | 49  | 32  | 20  | 34  | 20  | 28  |     | years                                        |  |
| Male                                                       | 0          | 1   | 0   | 1   | 0   | 0   | 0   | 0   | 0   | 0   | 0   | 1   | 1          | 0   | 0   | 0   | 0   | 0   | 0   | 1   | 1   | 0   |     | 1=yes; 0=no                                  |  |
| Female                                                     | 1          | 0   | 1   | 0   | 1   | 1   | 1   | 1   | 1   | 1   | 1   | 0   | 0          | 1   | 1   | 1   | 1   | 1   | 1   | 0   | 0   | 1   |     | 1=yes; 0=no                                  |  |
| Smoker                                                     | 1          | 1   | 1   | 0   | 0   | 0   | 0   | 0   | 0   | 0   | 1   | 0   | 0          | 0   | 1   | 1   | 0   | 1   | 1   | 1   | 0   | 0   |     | 1=current or previous smoker; 0=never smoked |  |
|                                                            |            |     |     |     |     |     |     |     |     |     |     |     |            |     |     |     |     |     |     |     |     |     |     |                                              |  |
| Inflammation                                               |            |     |     |     |     |     |     |     |     |     |     |     |            |     |     |     |     |     |     |     |     |     |     |                                              |  |
| Macroscopic                                                | 0          | 0   | 0   | 0   | 0   | 0   | 0   | 0   | 0   | 0   | 0   | 0   | 0          | 0   | 0   | 0   | 0   | 0   | 0   | 0   | 0   | 0   | 0   | 1=yes; 0=no                                  |  |
| Microscopic                                                | 0          | 0   | 0   | 0   | 0   | 0   | 0   | 0   | 0   | 0   | 0   | 0   | 0          | 0   | 0   | 0   | 0   | 0   | 0   | 0   | 0   | 0   | 0   | 1=yes; 0=no                                  |  |
| None                                                       | 1          | 1   | 1   | 1   | 1   | 1   | 1   | 1   | 1   | 1   | 1   | 1   | 1          | 1   | 1   | 1   | 1   | 1   | 1   | 1   | 1   | 1   | 1   | 1=yes; 0=no                                  |  |
|                                                            |            |     |     |     |     |     |     |     |     |     |     |     |            |     |     |     |     |     |     |     |     |     |     |                                              |  |
| Phenotypes and Involvement                                 |            |     |     |     |     |     |     |     |     |     |     |     |            |     |     |     |     |     |     |     |     |     |     |                                              |  |
| Deep Ulcers                                                | UNK        | UNK | UNK | UNK | UNK | UNK | UNK | UNK | UNK | UNK | UNK | UNK | UNK        | UNK | UNK | UNK | UNK | UNK | UNK | UNK | UNK | UNK | UNK | UNK                                          |  |
| Perianal                                                   | 0          | 0   | 0   | 1   | 0   | 1   | 1   | 1   | 1   | 0   | 0   | 0   | 0          | 0   | 0   | 0   | 0   | 0   | 0   | 0   | 0   | 0   | 0   | 1=yes; 0=no                                  |  |
| Sigmoid                                                    | 0          | 1   | 0   | 1   | 1   | 1   | 1   | 1   | 1   | 0   | 1   | 0   | 0          | 0   | 0   | 0   | 0   | 0   | 1   | 0   | 1   | 0   | 0   | 1=yes; 0=no                                  |  |
| Rectal                                                     | 1          | 1   | 0   | 1   | 1   | 1   | 1   | 1   | 1   | 1   | 1   | 0   | 0          | 0   | 0   | 0   | 0   | 0   | 0   | 0   | 0   | 0   | 0   | 1=yes; 0=no                                  |  |
| Ileal Disease                                              | 1          | 0   | 1   | 1   | 0   | 0   | 0   | 0   | 0   | 1   | 0   | 1   | 1          | 1   | 1   | 1   | 1   | 0   | 1   | 1   | 1   | 1   | 1   | 1=yes; 0=no                                  |  |
| Inflammatory                                               | 0          | 0   | 0   | 0   | 1   | 0   | 0   | 0   | 0   | 1   | 1   | 1   | 0          | 0   | 0   | 0   | 0   | 1   | 0   | 0   | 0   | 0   | 0   | 1=yes; 0=no                                  |  |
| Strictureing                                               | 1          | 0   | 0   | 1   | 0   | 1   | 0   | 1   | 0   | 0   | 0   | 0   | 1          | 1   | 1   | 1   | 1   | 0   | 1   | 0   | 0   | 0   | 1   | 1=yes; 0=no                                  |  |
| Penetrating                                                | 0          | 1   | 1   | 0   | 0   | 1   | 1   | 0   | 0   | 0   | 0   | 0   | 0          | 0   | 1   | 0   | 1   | 0   | 0   | 1   | 1   | 1   | 1   | 1=yes; 0=no                                  |  |
|                                                            |            |     |     |     |     |     |     |     |     |     |     |     |            |     |     |     |     |     |     |     |     |     |     |                                              |  |
| Pre-operative treatment history                            |            |     |     |     |     |     |     |     |     |     |     |     |            |     |     |     |     |     |     |     |     |     |     |                                              |  |
| Steroids                                                   | 1          | 0   | 1   | 1   | 1   | 1   | 1   | 1   | 1   | 1   | 1   | 1   | 1          | 1   | 1   | 1   | 0   | 1   | 1   | 1   | 1   | 0   | 1   | 1=yes; 0=no                                  |  |
| 5-ASA                                                      | 1          | 1   | 0   | 1   | 1   | 1   | 1   | 1   | 1   | 1   | 1   | 1   | 1          | 1   | 1   | 1   | 0   | 1   | 1   | 1   | 1   | 0   | 1   | 1=yes; 0=no                                  |  |
| Immunomodulation                                           | 0          | 0   | 0   | 1   | 1   | 1   | 1   | 1   | 1   | 1   | 1   | 1   | 1          | 1   | 0   | 1   | 1   | 1   | 1   | 0   | 1   | 1   | 1   | 1=yes; 0=no                                  |  |
| Anti-TNF                                                   | 1          | 0   | 1   | 1   | 1   | 1   | 1   | 1   | 1   | 1   | 1   | 1   | 1          | 1   | 1   | 0   | 1   | 1   | 1   | 0   | 0   | 1   | 1   | 1=yes; 0=no                                  |  |
| Non-anti-TNF biologic                                      | 0          | 0   | 0   | 0   | 0   | 0   | 0   | 1   | 0   | 1   | 0   | 0   | 0          | 0   | 0   | 0   | 0   | 0   | 0   | 0   | 0   | 0   | 0   | 1=yes; 0=no                                  |  |
|                                                            |            |     |     |     |     |     |     |     |     |     |     |     |            |     |     |     |     |     |     |     |     |     |     |                                              |  |
| Post-operative outcome                                     |            |     |     |     |     |     |     |     |     |     |     |     |            |     |     |     |     |     |     |     |     |     |     |                                              |  |
| Disease recurrence                                         | 0          | UNK | 0   | 0   | 0   | 0   | 0   | 0   | 0   | 0   | 0   | 0   | UNK        | 0   | 1   | UNK | 0   | 0   | 0   | 0   | 1   | 0   | 0   | 1=yes; 0=no                                  |  |
| Biologic Use                                               | 0          | 0   | 0   | 0   | 0   | 0   | 0   | 0   | 1   | 0   | 0   | 0   | UNK        | 1   | 0   | 1   | 1   | 1   | 0   | 1   | 1   | 0   | 0   | 1=yes; 0=no                                  |  |
| Colectomy                                                  | 0          | 1   | 0   | 1   | 1   | 1   | 1   | 0   | 1   | 0   | 0   | 0   | 0          | 0   | 0   | 0   | 0   | 0   | 0   | 0   | 0   | 0   | 0   | 1=yes; 0=no                                  |  |
| Second resection                                           | 0          | 0   | 1   | 1   | 1   | 1   | 0   | 0   | 1   | 0   | 1   | 0   | 0          | 0   | 1   | 1   | 0   | 0   | 0   | 0   | 0   | 1   | 0   | 1=yes; 0=no                                  |  |
| Time to first resection (years)                            | 6          | 5   | 6   | 6   | 1   | 19  | 5   | 23  | 4   | 3   | 4   |     | 2          | 9   | 0   | 14  | 33  | 13  | 4   | 2   | 0   |     |     | years                                        |  |
| Time from first to second resection (years, if applicable) | NA         | NA  | 1   | 3   | 15  | 1   | NA  | NA  | 1   | NA  | 47  |     | NA         | NA  | 3   | 5   | NA  | NA  | NA  | NA  | 1   | NA  |     | years                                        |  |

Supplemental Table 2: Characteristics of individual adult Crohn's disease patients. NA = Not applicable. UNK = unknown.

**Supplemental Table 2:** Characteristics of individual adult Crohn's disease patients. NA = Not applicable. UNK = unknown.

**Supplementary Table 2:** Characteristics of individual adult Crohn's disease patients.  
NA = Not applicable. UNK = unknown.

**Supplementary Table 3**

| Patient ID                                                 | 22 | 23 | 27 | 30 | 32 | 36 | 39 | 43 | 48 | 49 | 50 |                                              |
|------------------------------------------------------------|----|----|----|----|----|----|----|----|----|----|----|----------------------------------------------|
| <i>Location</i>                                            |    |    |    |    |    |    |    |    |    |    |    |                                              |
| Ileum-only                                                 | 0  | 0  | 0  | 0  | 0  | 0  | 0  | 0  | 0  | 0  | 0  | 1=yes; 0=no                                  |
| Colon-only                                                 | 1  | 1  | 1  | 1  | 1  | 1  | 1  | 1  | 1  | 1  | 1  | 1=yes; 0=no                                  |
| Ileum+Colon                                                | 0  | 0  | 0  | 0  | 0  | 0  | 0  | 0  | 0  | 0  | 0  | 1=yes; 0=no                                  |
| <i>Patient Characteristics</i>                             |    |    |    |    |    |    |    |    |    |    |    |                                              |
| Age at Surgery (years)                                     | 53 | 52 | 70 | 82 | 44 | 41 | 52 | 45 | 70 | 62 | 49 | years                                        |
| Male                                                       | 0  | 1  | 1  | 0  | 1  | 0  | 1  | 0  | 1  | 1  | 0  | 1=yes; 0=no                                  |
| Female                                                     | 1  | 0  | 0  | 1  | 0  | 1  | 0  | 1  | 0  | 0  | 1  | 1=yes; 0=no                                  |
| Smoker                                                     |    |    |    |    |    |    |    |    |    |    |    | 1=current or previous smoker; 0=never smoked |
| <i>Inflammation</i>                                        |    |    |    |    |    |    |    |    |    |    |    |                                              |
| Macroscopic                                                | 0  | 0  | 0  | 0  | 0  | 0  | 0  | 0  | 0  | 0  | 0  | 1=yes; 0=no                                  |
| Microscopic                                                | 0  | 0  | 0  | 0  | 0  | 0  | 0  | 0  | 0  | 0  | 0  | 1=yes; 0=no                                  |
| None                                                       | 1  | 1  | 1  | 1  | 1  | 1  | 1  | 1  | 1  | 1  | 1  | 1=yes; 0=no                                  |
| <i>Disease Phenotypes</i>                                  |    |    |    |    |    |    |    |    |    |    |    |                                              |
| Colon Cancer                                               | 1  | 1  | 0  | 1  | 1  | 0  | 1  | 0  | 0  | 0  | 0  |                                              |
| Diverticulitis                                             | 0  | 0  | 1  | 0  | 0  | 0  | 0  | 0  | 0  | 0  | 0  | 1=yes; 0=no                                  |
| Colonic Inertia                                            | 0  | 0  | 0  | 0  | 0  | 1  | 0  | 1  | 0  | 0  | 0  | 1=yes; 0=no                                  |
| Adenoma                                                    | 0  | 0  | 0  | 0  | 0  | 0  | 0  | 0  | 1  | 1  | 0  | 1=yes; 0=no                                  |
| Si Neuroendocrine Tumor                                    | 0  | 0  | 0  | 0  | 0  | 0  | 0  | 0  | 0  | 0  | 1  | 1=yes; 0=no                                  |
| <i>Pre-operative treatment history</i>                     |    |    |    |    |    |    |    |    |    |    |    |                                              |
| Steroids                                                   |    |    |    |    |    |    |    |    |    |    |    | 1=yes; 0=no                                  |
| 5-ASA                                                      |    |    |    |    |    |    |    |    |    |    |    | 1=yes; 0=no                                  |
| Immunomodulation                                           |    |    |    |    |    |    |    |    |    |    |    | 1=yes; 0=no                                  |
| Anti-TNF                                                   |    |    |    |    |    |    |    |    |    |    |    | 1=yes; 0=no                                  |
| Non-anti-TNF biologic                                      |    |    |    |    |    |    |    |    |    |    |    | 1=yes; 0=no                                  |
| <i>Post-operative outcome</i>                              |    |    |    |    |    |    |    |    |    |    |    |                                              |
| Disease recurrence                                         |    |    |    |    |    |    |    |    |    |    |    | 1=yes; 0=no                                  |
| Biologic Use                                               |    |    |    |    |    |    |    |    |    |    |    | 1=yes; 0=no                                  |
| Colectomy                                                  |    |    |    |    |    |    |    |    |    |    |    | 1=yes; 0=no                                  |
| Second resection                                           |    |    |    |    |    |    |    |    |    |    |    | 1=yes; 0=no                                  |
| Time to first resection (years)                            |    |    |    |    |    |    |    |    |    |    |    | years                                        |
| Time from first to second resection (years, if applicable) |    |    |    |    |    |    |    |    |    |    |    | years                                        |

**Supplemental Table 3:** Charactersitics of individual adult non-IBD patients.

**Supplementary Table 3:** Characteristics of individual adult non-IBD patients.

## REFERENCES

- 1 Simon JM, Giresi PG, Davis IJ, Lieb JD. Using formaldehyde-assisted isolation of regulatory elements (FAIRE) to isolate active regulatory DNA. *Nature protocols* 2012;**7**:256-67.
- 2 Peck BC, Weiser M, Lee SE, Gipson GR, Iyer VB, Sartor RB, *et al.* MicroRNAs Classify Different Disease Behavior Phenotypes of Crohn's Disease and May Have Prognostic Utility. *Inflamm Bowel Dis* 2015;**21**:2178-87.
- 3 Liu EY, Li M, Wang W, Li Y. MaCH-admix: genotype imputation for admixed populations. *Genet Epidemiol* 2013;**37**:25-37.
- 4 Wu TD, Nacu S. Fast and SNP-tolerant detection of complex variants and splicing in short reads. *Bioinformatics* 2010;**26**:873-81.
- 5 Buchkovich ML, Eklund K, Duan Q, Li Y, Mohlke KL, Furey TS. Removing reference mapping biases using limited or no genotype data identifies allelic differences in protein binding at disease-associated loci. *BMC Med Genomics* 2015;**8**:43.
- 6 Anders S, Huber W. Differential expression analysis for sequence count data. *Genome biology* 2010;**11**:R106.
- 7 Haberman Y, Tickle TL, Dexheimer PJ, Kim MO, Tang D, Karns R, *et al.* Pediatric Crohn disease patients exhibit specific ileal transcriptome and microbiome signature. *J Clin Invest* 2014;**124**:3617-33.
- 8 Lassmann T, Hayashizaki Y, Daub CO. TagDust-a program to eliminate artifacts from next generation sequencing data. *Bioinformatics* 2009;**25**:2839-40.
- 9 Johnson WE, Li C, Rabinovic A. Adjusting batch effects in microarray expression data using empirical Bayes methods. *Biostatistics* 2007;**8**:118-27.
- 10 Boyle AP, Guinney J, Crawford GE, Furey TS. F-Seq: a feature density estimator for high-throughput sequence tags. *Bioinformatics* 2008;**24**:2537-8.
- 11 Simon JM, Hacker KE, Singh D, Brannon AR, Parker JS, Weiser M, *et al.* Variation in chromatin accessibility in human kidney cancer links H3K36 methyltransferase loss with widespread RNA processing defects. *Genome Research* 2013;**xx**:yy-yy.
- 12 Quinlan AR, Hall IM. BEDTools: a flexible suite of utilities for comparing genomic features. *Bioinformatics* 2010;**26**:841-2.
- 13 Roadmap Epigenomics C, Kundaje A, Meuleman W, Ernst J, Bilenky M, Yen A, *et al.* Integrative analysis of 111 reference human epigenomes. *Nature* 2015;**518**:317-30.
- 14 Comelli EM, Lariani S, Zwahlen MC, Fotopoulos G, Holzwarth JA, Cherbut C, *et al.* Biomarkers of human gastrointestinal tract regions. *Mamm Genome* 2009;**20**:516-27.
- 15 Xiong Q, Ancona N, Hauser ER, Mukherjee S, Furey TS. Integrating genetic and gene expression evidence into genome-wide association analysis of gene sets. *Genome Res* 2012;**22**:386-97.
- 16 Xiong Q, Mukherjee S, Furey TS. GSAASeqSP: a toolset for gene set association analysis of RNA-Seq data. *Sci Rep* 2014;**4**:6347.
- 17 Merico D, Isserlin R, Stueker O, Emili A, Bader GD. Enrichment map: a network-based method for gene-set enrichment visualization and interpretation. *PLoS One* 2010;**5**:e13984.
